# Supplementary material for: The synthesis, structure, and magnetic properties of two novel manganese(ii) azido/formate coordination polymers with isonicotinic acid N-oxide as a coligand
Source: Royal Society of Chemistry journal article supplement (doi:10.1039/c3ce42158a), 2013-12-04
Supplement: c3ce42158a.pdf [file c3ce42158a.pdf]

## Electronic Supporting Information (ESI)

# Synthesis, Structure, and Magnetic Properties of Two Novel Manganese (II) Azido/Formate Coordination Polymers with Isonicotinic Acid N-oxide as Coligand

Lei Wang<sup>a</sup>, Rui Zhao<sup>a</sup>, Long-Yang Xu<sup>a</sup>, Ting Liu<sup>a</sup>, Jiong-Peng Zhao<sup>\*a</sup>, Shi-Ming Wang<sup>\*a</sup>,  
Fu-Chen Liu<sup>\*ab</sup>

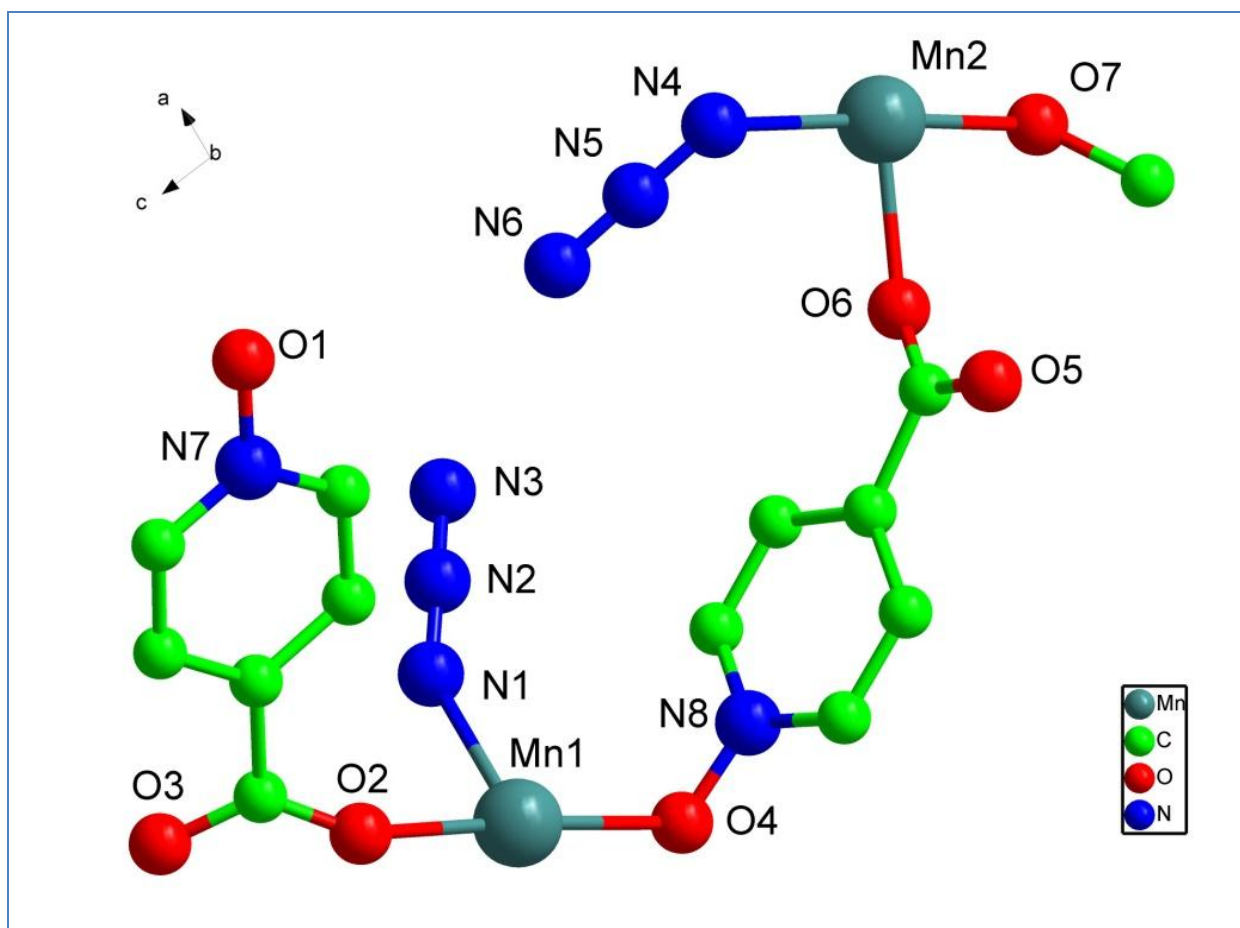

**Figure S1.** View of asymmetric unit of **1**.

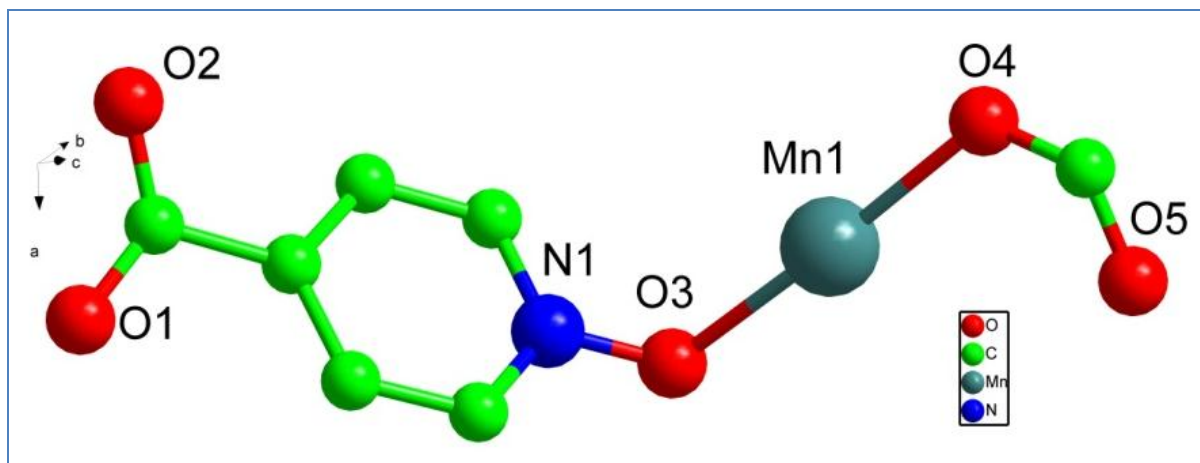

**Figure S2.** View of asymmetric unit of **2**.

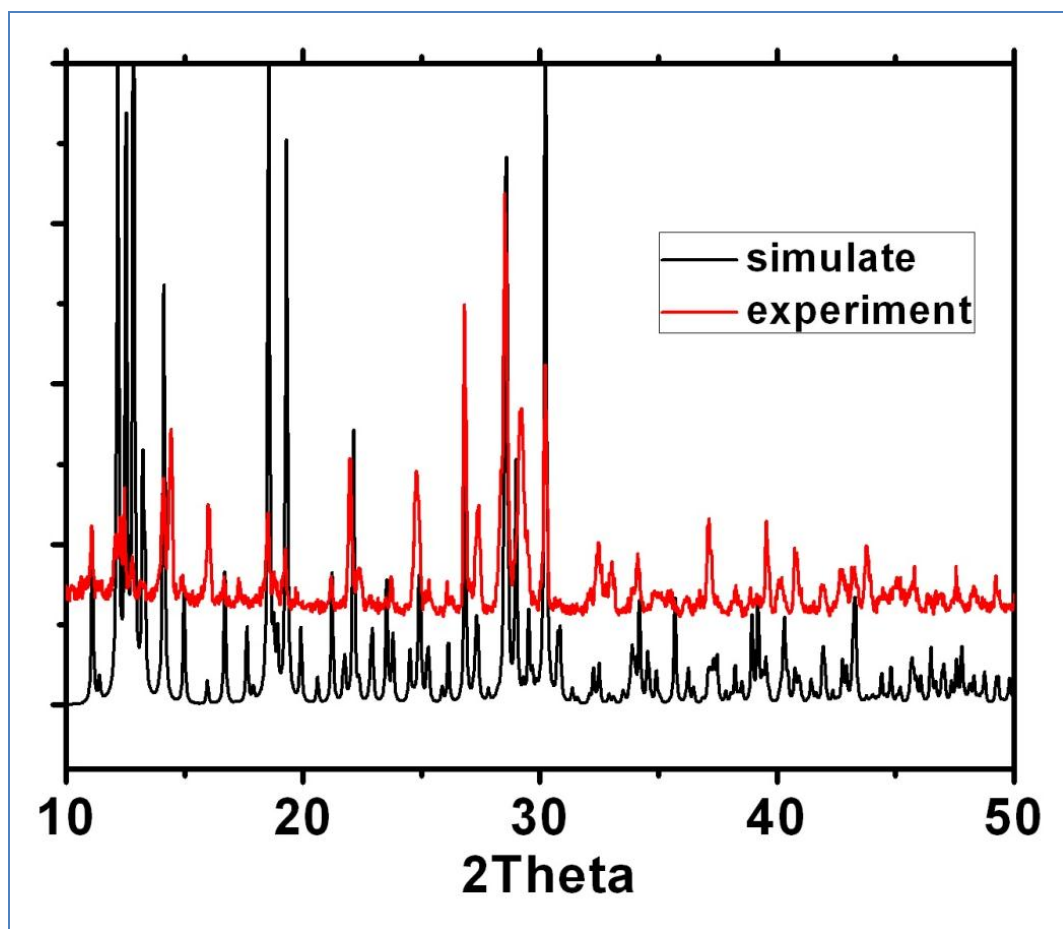

**Figure S3.** Simulated and experimental XRPD patterns for complex 1.

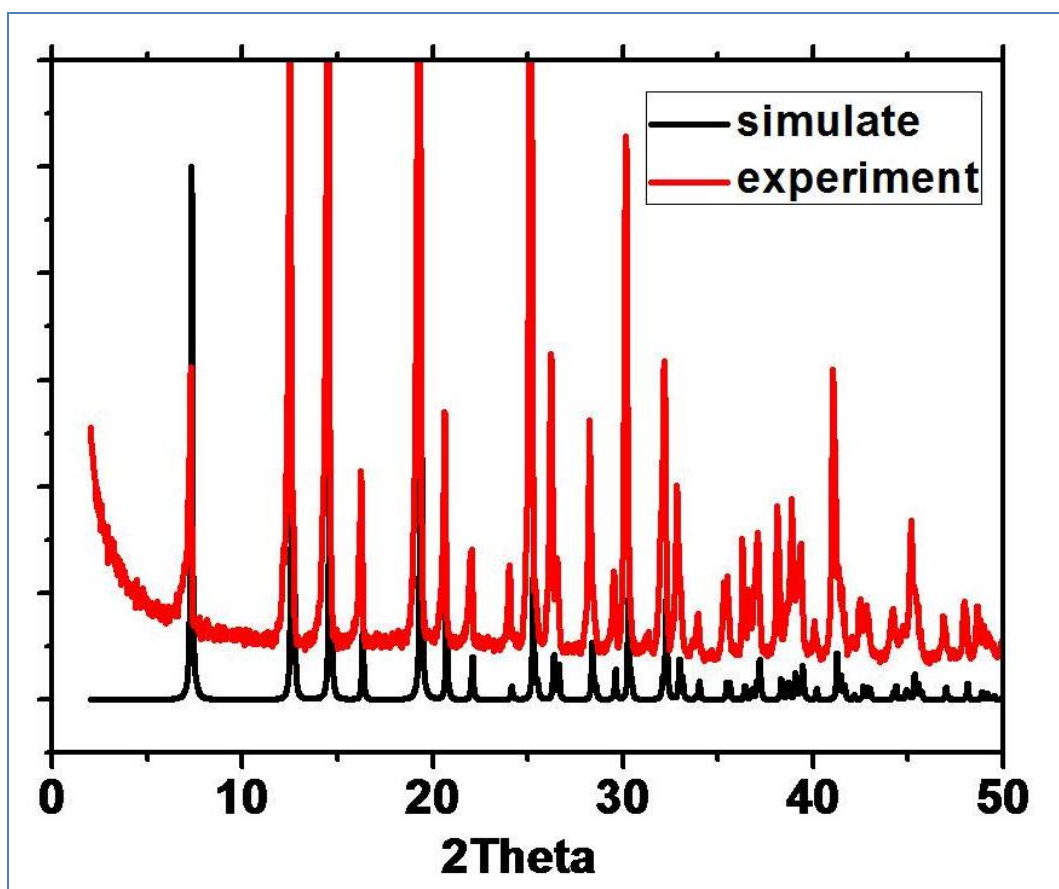

**Figure S4.** Simulated and experimental XRPD patterns for complex 2.

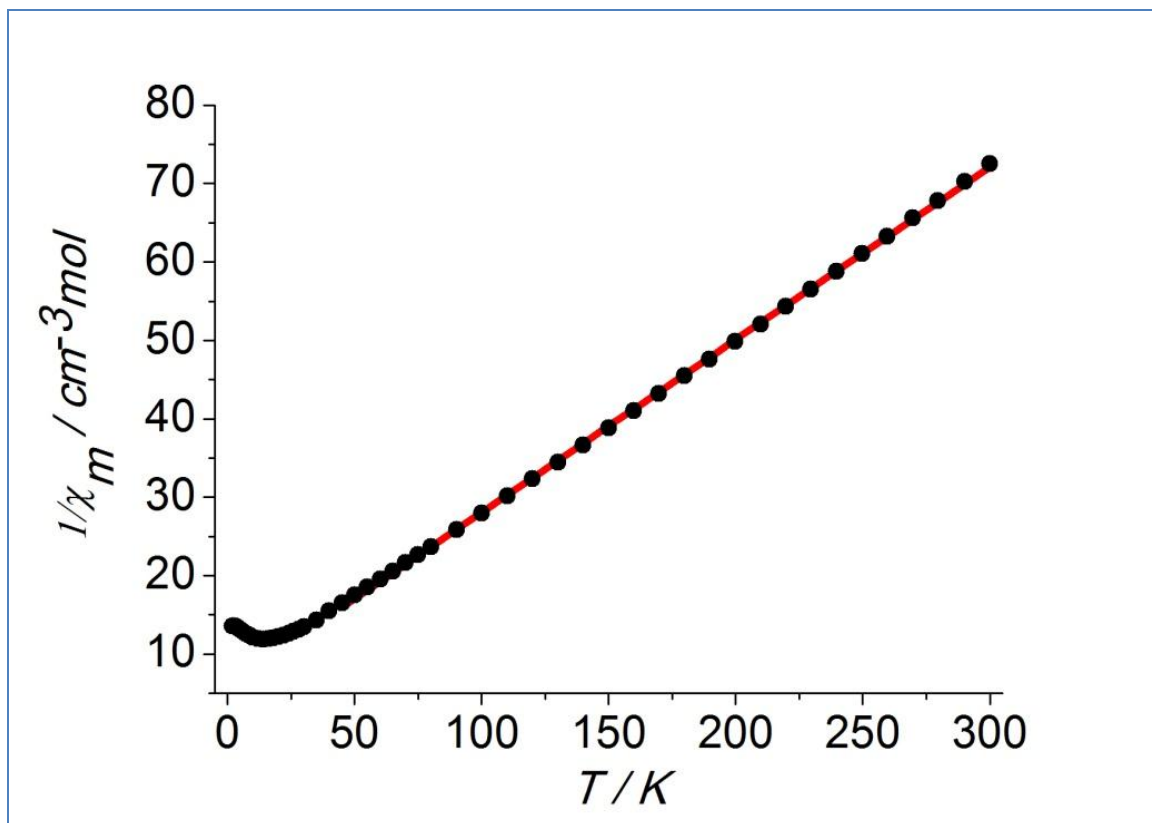

**Figure S5.** Plots of the  $1/\chi_m$  vs  $T$  for **1**. The red solid line shows the Curie–Weiss fitting (50–300 K).

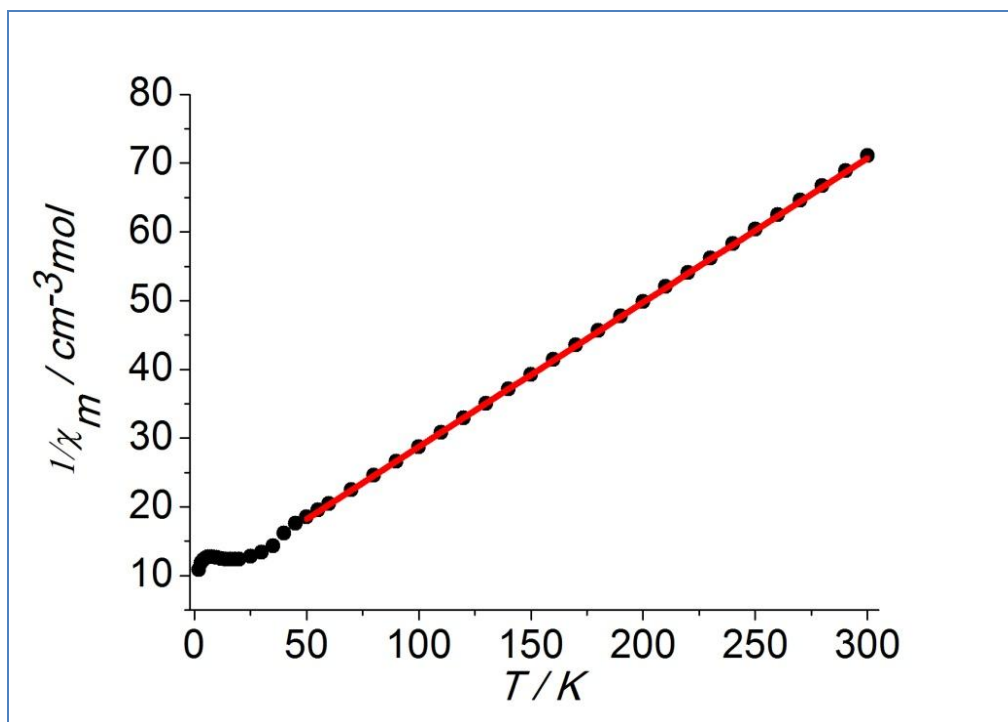

**Figure S6** Plots of the  $1/\chi_m$  vs  $T$  for **2**. The red solid line shows the Curie–Weiss fitting (50–300 K).
